# Supplementary material for: Surface enhanced Raman scattering fiber optic sensor as an ion selective optrode: the example of Cd2+detection
Source: Royal Society of Chemistry journal article supplement (doi:10.1039/c4ra11260a), 2014-11-18
Supplement: c4ra11260a1.pdf [file c4ra11260a1.pdf]

## Surface enhanced Raman scattering fiber optic sensor as ion selective optrode: the example of Cd<sup>2+</sup> detection

Fansheng Cheng,<sup>a</sup> Haibing Xu,<sup>c</sup> Cong Wang,<sup>a</sup> Zhengjun Gong,<sup>b</sup> Changyu Tang,<sup>a</sup> Meikun Fan<sup>b\*</sup>

<sup>a</sup>Chengdu Green Energy and Green Manufacturing R&D Centre, Chengdu, Sichuan, 610207, China

<sup>b</sup>Department of Environmental Science and Engineering, Southwest Jiaotong University, Chengdu, Sichuan, 610031, China.

<sup>c</sup>New Materials R&D Center, Institute of Chemical Materials, China Academy of Engineering Physics, Chengdu, Sichuan 610200, China.

\* Corresponding author: [meikunfan@gmail.com](mailto:meikunfan@gmail.com)

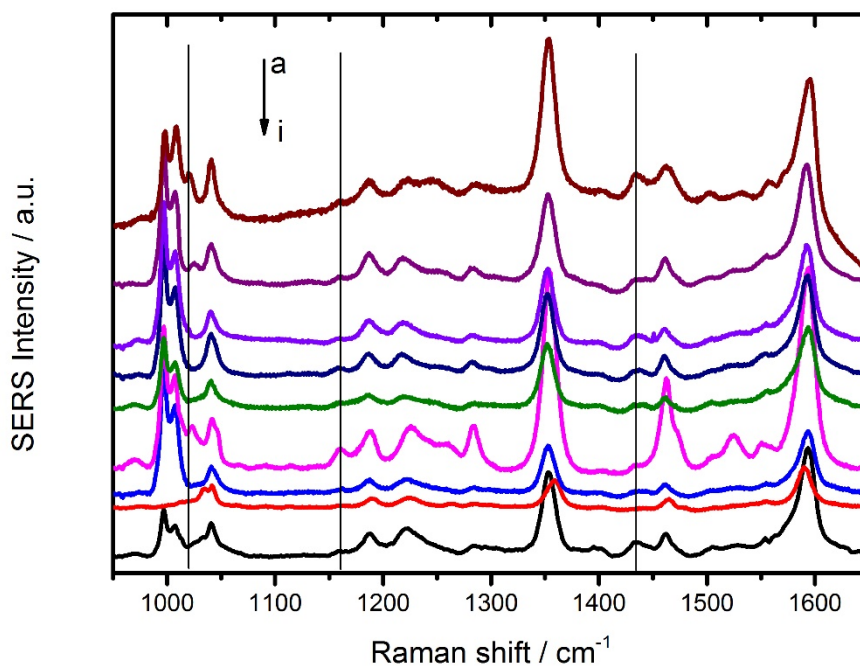

Figure S1, SERS spectra of PMTTP after binding to (a to i): 0.05 mM Cd<sup>2+</sup>, 1 mM Co<sup>2+</sup>, 1 mM Ca<sup>2+</sup>, 1 mM Al<sup>3+</sup>, 1 mM Ni<sup>2+</sup>, 1 mM Fe<sup>3+</sup>, 1 mM Cr<sup>3+</sup>, 1 mM Cu<sup>2+</sup>, 1 mM Na<sup>+</sup>.
